# Supplementary material for: The density of tumor-infiltrating lymphocytes and prognosis in resectable hepatocellular carcinoma: a two-phase study
Source: publisher site journal article supplement (doi:10.18632/aging.202710), 2021-03-19
Supplement: Supplementary file [file aging-v13i7-202710-supplementary-material-SD2.pdf]

## SUPPLEMENTARY TABLES

**Supplementary Table 1. Characteristics of patients in the West China Hospital (WCH) and The Cancer Genome Atlas (TCGA) sets.**

| Characteristic                     | WCH set<br>(n=316) | TCGA set<br>(n=370) | P      |
|------------------------------------|--------------------|---------------------|--------|
| Sex                                |                    |                     | <0.001 |
| Male                               | 258 (81)           | 249 (66)            |        |
| Female                             | 58 (19)            | 121 (31)            |        |
| Age, years                         |                    |                     | <0.001 |
| Mean                               | 51.28              | 59.35               |        |
| ≤40                                | 55 (19)            | 32 (8)              |        |
| 40-60                              | 181 (54)           | 145 (36)            |        |
| ≥60                                | 80 (27)            | 193 (52)            |        |
| Race                               |                    |                     | <0.001 |
| Asian                              | 316 (100)          | 157 (45)            |        |
| White                              | 0                  | 184 (47)            |        |
| Others                             | 0                  | 29 (4)              |        |
| Risk factor                        |                    |                     | <0.001 |
| HBV                                | 214 (99)           | 104 (30)            |        |
| HCV                                | 3 (1)              | 56 (16)             |        |
| Alcohol                            | 0                  | 117 (33)            |        |
| Nonalcoholic steatohepatitis       | 0                  | 20 (6)              |        |
| Other                              | 0                  | 11 (3)              |        |
| No history of primary risk factors | 0                  | 91 (26)             |        |
| NA                                 | 99                 | 19                  |        |
| Serum AFP level, ng/ml             |                    |                     | 0.007  |
| >20                                | 181 (58)           | 130 (47)            |        |
| ≤20                                | 131 (42)           | 147 (53)            |        |
| NA                                 | 4                  | 93                  |        |
| No. of tumors                      |                    |                     |        |
| 1                                  | 227 (82)           |                     |        |
| >1                                 | 51 (18)            |                     |        |
| NA                                 | 38                 | 370                 |        |
| Mean tumor size (range), cm        | 5.98 (0.3-19)      | NA                  |        |
| Vascular invasion                  |                    |                     | 0.672  |
| Yes                                | 97 (31)            | 108 (34)            |        |
| No                                 | 219 (69)           | 206 (66)            |        |
| NA                                 |                    | 56                  |        |
| Tumor differentiation              |                    |                     | 0.084  |
| I                                  | 7 (2)              | 55 (14)             |        |
| II                                 | 160 (55)           | 177 (47)            |        |
| III/IV                             | 122 (42)           | 133 (35)            |        |
| NA                                 | 27                 | 5                   |        |
| Ishak score                        |                    |                     | <0.001 |
| 0                                  | 70 (25)            | 74 (35)             |        |
| 1-2                                | 10 (4)             | 31 (15)             |        |
| 3-4                                | 59 (21)            | 28 (13)             |        |
| 5-6                                | 142 (50)           | 78 (37)             |        |
| NA                                 | 35                 | 159                 |        |

| Percentage of TILs                    |           |            |
|---------------------------------------|-----------|------------|
| 1                                     | 122 (39)  | 111 (32)   |
| 5                                     | 53 (17)   | 70 (21)    |
| 10                                    | 51 (16)   | 15 (4)     |
| 20                                    | 39 (12)   | 41 (12)    |
| 30                                    | 14 (4)    | 47 (14)    |
| 40                                    | 2 (1)     | 20 (6)     |
| 50                                    | 13 (4)    | 12 (3)     |
| 60                                    | 9 (3)     | 13 (4)     |
| 70                                    | 3 (1)     | 4 (1)      |
| 80                                    | 5 (2)     | 6 (2)      |
| 90                                    | 4 (1)     | 4 (1)      |
| NA                                    | 1         | 27         |
| No. of deaths                         | 99 (33)   | 130 (34)   |
| Median follow-up time (range), months | 34 (1-93) | 19 (0-120) |

Note: Data are no. of patients (%) unless otherwise indicated.

Abbreviations: HBV, hepatitis B virus; HCV, hepatitis C virus; AFP, alpha fetoprotein; NA, not available.

**Supplementary Table 2. Expression of immune-related markers by the intensity of TILs.**

|                   | TILs-low (n=175) | TILs-high (n=34) | <i>P</i>               |
|-------------------|------------------|------------------|------------------------|
| CD8               |                  |                  |                        |
| Low               | 100              | 8                | 4.59× 10 <sup>-4</sup> |
| High              | 74               | 25               |                        |
| CD4               |                  |                  |                        |
| Low               | 62               | 11               | 0.21                   |
| High              | 56               | 17               |                        |
| CD68              |                  |                  |                        |
| Low               | 95               | 14               | 0.21                   |
| High              | 80               | 19               |                        |
| OX40              |                  |                  |                        |
| Low               | 110              | 15               | 0.04                   |
| High              | 65               | 19               |                        |
| PD-1              |                  |                  |                        |
| Low               | 160              | 21               | 8.62× 10 <sup>-6</sup> |
| High              | 15               | 12               |                        |
| PD-L1_tumor       |                  |                  |                        |
| Negative          | 145              | 26               | 0.23                   |
| Positive          | 18               | 6                |                        |
| PD-L1_immune cell |                  |                  |                        |
| Negative          | 141              | 21               | 3.97× 10 <sup>-3</sup> |
| Positive          | 22               | 11               |                        |

**Supplementary Table 3. Mortality risks by the intensity of TILs for overall survival and disease-free survival in univariable analysis.**

| Group                              | TILs intensity   | Overall survival   |                  |                         | Disease-free survival   |                  |                         |
|------------------------------------|------------------|--------------------|------------------|-------------------------|-------------------------|------------------|-------------------------|
|                                    |                  | No. of cases/total | HR               | P                       | No. of cases/total      | HR               | P                       |
| <b>Discovery phase (WCH set)</b>   |                  |                    |                  |                         |                         |                  |                         |
| Low                                | TILs < 10%       | 67/172             | 1 (reference)    |                         | 80/103                  | 1 (reference)    |                         |
| Intermediate                       | 10% ≤ TILs < 50% | 24/106             | 0.54 (0.34-0.86) | 0.01                    | 21/58                   | 0.34 (0.21-0.56) | 1.56 × 10 <sup>-5</sup> |
| High                               | TILs ≥ 50%       | 5/34               | 0.33 (0.13-0.83) | 0.02                    | 5/22                    | 0.21 (0.09-0.52) | 7.86 × 10 <sup>-4</sup> |
| <i>P</i> for trend                 |                  |                    |                  | 1.14 × 10 <sup>-3</sup> | 6.50 × 10 <sup>-7</sup> |                  |                         |
| <b>Validation phase (TCGA set)</b> |                  |                    |                  |                         |                         |                  |                         |
| Low                                | TILs < 10%       | 81/181             | 1 (reference)    |                         | 100/154                 | 1 (reference)    |                         |
| Intermediate                       | 10% ≤ TILs < 50% | 30/123             | 0.44 (0.29-0.67) | 1.45 × 10 <sup>-4</sup> | 50/111                  | 0.53(0.38-0.74)  | 2.78 × 10 <sup>-4</sup> |
| High                               | TILs ≥ 50%       | 8/39               | 0.32 (0.16-0.67) | 2.40 × 10 <sup>-3</sup> | 11/33                   | 0.30 (0.16-0.55) | 6.09 × 10 <sup>-4</sup> |
| <i>P</i> for trend                 |                  |                    |                  | 1.60 × 10 <sup>-6</sup> | 1.38 × 10 <sup>-6</sup> |                  |                         |

**Supplementary Table 4. Mortality risks by the intensity of TILs, tumor stage, and tumor grade for overall survival and disease-free survival in the WCH cohort.**

|                       | Overall survival   |                  |                         | Disease-free survival |                  |                         |
|-----------------------|--------------------|------------------|-------------------------|-----------------------|------------------|-------------------------|
|                       | No. of cases/total | HR               | P                       | No. of cases/total    | HR               | P                       |
| <b>TILs intensity</b> |                    |                  |                         |                       |                  |                         |
| Low                   | 67/172             | 1 (reference)    |                         | 80/103                | 1 (reference)    |                         |
| Intermediate          | 24/106             | 0.58 (0.36-0.93) | 0.02                    | 21/58                 | 0.35 (0.22-0.58) | 4.59 × 10 <sup>-5</sup> |
| High                  | 5/34               | 0.37 (0.15-0.93) | 0.04                    | 5/22                  | 0.23 (0.09-0.58) | 1.83 × 10 <sup>-3</sup> |
| <b>Stage (BCLC)</b>   |                    |                  |                         |                       |                  |                         |
| A                     | 61/218             | 1 (reference)    |                         | 63/121                | 1 (reference)    |                         |
| B                     | 19/47              | 1.57 (0.92-2.69) | 0.10                    | 21/31                 | 1.52 (0.92-2.52) | 0.11                    |
| C                     | 10/13              | 3.92 (1.97-7.81) | 1.03 × 10 <sup>-4</sup> | 12/13                 | 3.29 (1.70-6.37) | 4.18 × 10 <sup>-4</sup> |
| <b>Tumor grade</b>    |                    |                  |                         |                       |                  |                         |
| I-II                  | 48/167             | 1 (reference)    |                         | 56/100                | 1 (reference)    |                         |
| III-IV                | 44/122             | 1.16 (0.76-1.77) | 0.49                    | 45/74                 | 1.10 (0.74-1.65) | 0.63                    |

**Supplementary Table 5. Mortality risks by the intensity of TILs, tumor stage, and tumor grade for overall survival and disease-free survival in the TCGA cohort.**

|                | Overall survival   |                  |                       | Disease-free survival |                  |                       |
|----------------|--------------------|------------------|-----------------------|-----------------------|------------------|-----------------------|
|                | No. of Cases/Total | HR               | P                     | No. of Cases/Total    | HR               | P                     |
| TILs intensity |                    |                  |                       |                       |                  |                       |
| Low            | 81/181             |                  |                       | 100/154               |                  |                       |
| Intermediate   | 30/123             | 0.42 (0.28-0.66) | $1.13 \times 10^{-4}$ | 50/111                | 0.52(0.37-0.74)  | $2.78 \times 10^{-4}$ |
| High           | 8/39               | 0.41 (0.19-0.86) | 0.02                  | 11/33                 | 0.33 (0.17-0.62) | $6.09 \times 10^{-4}$ |
| Stage (AJCC)   |                    |                  |                       |                       |                  |                       |
| I              | 42/168             |                  |                       | 61/147                |                  |                       |
| II             | 26/84              | 1.57(0.94-2.61)  | 0.08                  | 43/71                 | 2.11(1.40-3.17)  | $3.37 \times 10^{-4}$ |
| III-IV         | 44/84              | 2.74(1.75-4.27)  | $9.56 \times 10^{-6}$ | 49/70                 | 2.55(1.73-3.78)  | $2.73 \times 10^{-6}$ |
| Tumor grade    |                    |                  |                       |                       |                  |                       |
| I-II           | 75/234             |                  |                       | 99/192                |                  |                       |
| III-IV         | 46/130             | 1.57 (1.05-2.33) | 0.03                  | 63/112                | 1.33 (0.96-1.86) | 0.09                  |

**Supplementary Table 6. Mortality risks with each point change in TILs intensity in univariable analysis.**

|             | Overall survival |                       | Disease-free survival |                       |
|-------------|------------------|-----------------------|-----------------------|-----------------------|
|             | HR               | P                     | HR                    | P                     |
| WCH cohort  | 0.99 (0.97-1.00) | 0.05                  | 0.98 (0.96-0.99)      | 0.002                 |
| TCGA cohort | 0.98 (0.97-0.99) | $4.43 \times 10^{-5}$ | 0.98(0.97-0.99)       | $4.60 \times 10^{-5}$ |
